# Supplementary material for: Collectively enhanced Ramsey readout by cavity sub- to superradiant transition
Source: PubMed Central journal article supplement (PMC10844618; doi:10.1038/s41467-024-45420-x), 2024-02-05
Supplement: 41467_2024_45420_MOESM3_ESM.pdf [file 41467_2024_45420_MOESM3_ESM.pdf]

## **Description of Additional Supplementary Files**

### **File name: Supplementary Code 1**

**Description: cavity\_sub-to-superradiance\_equations:** Julia program using QuantumCumulants.jl to derive and show the generic second-order cumulant equations for our system.

### **File name: Supplementary Code 2**

**Description: cavity\_sub-to-superradiance\_simulations:** Second-order cumulant simulation with the open-source Julia package QuantumCumulants.jl to reproduce the theory results for our system.
